# Supplementary material for: Tandem Mass Spectrometry de novo Sequencing of the Skin Defense Peptides of the Central Slovenian Agile Frog Rana dalmatina
Source: MDPI journal article supplement (doi:10.3390/molecules28207118), 2023-10-16
Supplement: s1 [file s1]

# Tandem Mass Spectrometry De Novo Sequencing of the Skin Defense Peptides of the Central Slovenian Agile Frog *Rana dalmatina*

Tatiana Yu. Samgina <sup>1,2,\*</sup>, Irina D. Vasileva <sup>2</sup>, Polonca Trebše <sup>3</sup>, Gregor Torkar <sup>4</sup>, Alexey K. Surin <sup>5</sup>, Zhaowei Meng <sup>6</sup>, Roman A. Zubarev <sup>6,7,8</sup> and Albert T. Lebedev <sup>1,2,\*</sup>

<sup>1</sup> Department of Materials Science, MSU-BIT University, Shenzhen 517182, China

<sup>2</sup> Department of Organic Chemistry, Lomonosov Moscow State University, 119991 Moscow, Russia; idvasilieva@gmail.com

<sup>3</sup> Faculty of Health Sciences, University of Ljubljana Zdravstvena Pot 5, 1000 Ljubljana, Slovenia; polonca.trebse@zf.uni-lj.si

<sup>4</sup> Department for Biology, Chemistry and Home Economics, University of Ljubljana Faculty of Education, Kardeljeva ploščad 16, Ljubljana, Slovenia; gregor.torkar@pef.uni-lj.si

<sup>5</sup> Pushchino Branch, Shemyakin–Ovchinnikov Institute of Bioorganic Chemistry, Russian Academy of Sciences, Prospekt Nauki 6, Pushchino, 142290 Moscow, Russia; alan@vega.protres.ru

<sup>6</sup> Department of Medicinal Biochemistry and Biophysics, Division of Molecular Biometry, Karolinska Institutet, Stockholm, Sweden; zhaowei.meng@ki.se (Z.M.); roman.zubarev@ki.se (R.A.Z.)

<sup>7</sup> The National Medical Research Center for Endocrinology, 115478 Moscow, Russia

<sup>8</sup> Department of Pharmacological & Technological Chemistry, I.M. Sechenov First Moscow State Medical University, 119146 Moscow, Russia

\* Correspondence: samgina@yandex.ru (T.Y.S.); mocehops@gmail.com (A.T.L.)

## Supplementary information

The raw files of all experimental data may be accessed by the following link

<https://disk.yandex.ru/d/C511Ho8TMtLcVQ>

The results of automatic search engine Novor.cloud may be found using the following link:

[https://app.novor.cloud/analyses/0b5c881a-c70c-4f11-9197-c0fe92ccb0a6?accessToken=eyJhbGciOiJIUzI1NiJ9.eyJzdWIiOiIwYjVjODgxYS1jNzBjLTRmMTU0OTU5Ny1jMGZlOTJjY2IwYTUyLjY3Qm9iOiJpZHZhc2lsaWV2YUBnbWVpbC5jb20ifQ.nJ4iwesp2naovLPk9yRdTS5\\_2wNi5zWtV9TyheHG5RM](https://app.novor.cloud/analyses/0b5c881a-c70c-4f11-9197-c0fe92ccb0a6?accessToken=eyJhbGciOiJIUzI1NiJ9.eyJzdWIiOiIwYjVjODgxYS1jNzBjLTRmMTU0OTU5Ny1jMGZlOTJjY2IwYTUyLjY3Qm9iOiJpZHZhc2lsaWV2YUBnbWVpbC5jb20ifQ.nJ4iwesp2naovLPk9yRdTS5_2wNi5zWtV9TyheHG5RM)

Table S1. Brevinin 1Db in silico fragmentation (Protein Calculator application by Thermo Fischer Scientific (Build 4.0.17))

| Brevinin 1Db |      |                      |                      |                       |                         |
|--------------|------|----------------------|----------------------|-----------------------|-------------------------|
| no           | acid | B [M+H] <sup>+</sup> | Y [M+H] <sup>+</sup> | C° [M+H] <sup>+</sup> | C° [M+2H] <sup>2+</sup> |
| 1            | F    | 148.0757             | -                    | 164.0944              | 82.55085                |
| 2            | F    | 295.1441             | 2461.407             | -                     | -                       |
| 3            | P    | 392.1969             | 2314.339             | 408.2156              | 204.6114                |
| 4            | A    | 463.234              | 2217.286             | 479.2527              | 240.13                  |
| 5            | F    | 610.3024             | 2146.249             | 626.3211              | 313.6642                |
| 6            | L    | 723.3865             | 1999.181             | 739.4052              | 370.2062                |
| 7            | K    | 851.4814             | 1886.097             | 867.5001              | 434.2537                |

|                                        |   |          |          |          |          |
|----------------------------------------|---|----------|----------|----------|----------|
| 8                                      | V | 950.5498 | 1758.002 | 966.5686 | 483.7879 |
| 9                                      | A | 1021.587 | 1658.933 | 1037.606 | 519.3065 |
| 10                                     | A | 1092.624 | 1587.896 | 1108.643 | 554.825  |
| 11                                     | K | 1220.719 | 1516.859 | 1236.738 | 618.8725 |
| 12                                     | V | 1319.787 | 1388.764 | 1335.806 | 668.4067 |
| 13                                     | V | 1418.856 | 1289.696 | -        | -        |
| 14                                     | P | 1515.909 | 1190.627 | 1531.927 | 766.4673 |
| 15                                     | S | 1602.941 | 1093.574 | 1618.959 | 809.9833 |
| 16                                     | I | 1716.025 | 1006.542 | 1732.043 | 866.5254 |
| 17                                     | L | 1829.109 | 893.4583 | 1845.127 | 923.0674 |
| 18                                     | C | 1931.11  | 780.3743 | 1947.129 | 974.0681 |
| 19                                     | S | 2018.142 |          | 2034.161 | 1017.584 |
| 20                                     | I | 2131.226 |          | 2147.245 | 1074.126 |
| 21                                     | T | 2232.274 |          | 2248.293 | 1124.65  |
| 22                                     | K | 2360.369 |          | 2376.388 | 1188.697 |
| 23                                     | K | 2488.464 |          | 2504.483 | 1252.745 |
| 24                                     | C | -        |          | -        | -        |
| sequence<br>:FFPAFLKVAAKVVP SILCSITKKC |   |          |          |          |          |

Table S2. Temporin 1Da in silico fragmentation (Protein Calculator application by Thermo Fischer Scientific (Build 4.0.17))

| Temporin 1Da               |      |                         |                         |                      |                           |                                      |
|----------------------------|------|-------------------------|-------------------------|----------------------|---------------------------|--------------------------------------|
| no                         | acid | B<br>[M+H] <sup>+</sup> | C<br>[M+H] <sup>+</sup> | Y [M+H] <sup>+</sup> | W [M+H] <sup>+</sup>      | Z <sup>o</sup><br>[M+H] <sup>+</sup> |
| 1                          | F    | 148.0757                | 165.1022                | -                    | -                         | -                                    |
| 2                          | L    | 261.1598                | -                       | 1253.834             | 1194.761                  | 1237.816                             |
| 3                          | P    | 358.2125                | 375.2391                | 1140.75              | 1097.708                  | -                                    |
| 4                          | L    | 471.2966                | 488.3231                | 1043.698             | 984.6241                  | 1027.679                             |
| 5                          | I    | 584.3806                | 601.4072                | 930.6135             | 885.555650/<br>899.571300 | 914.5953                             |
| 6                          | A    | 655.4178                | 672.4443                | 817.5294             |                           | 801.5113                             |
| 7                          | G    | 712.4392                | 729.4658                | 746.4923             |                           | 730.4741                             |
| 8                          | L    | 825.5233                | 842.5498                | 689.4709             | 630.3974                  | 673.4527                             |
| 9                          | L    | 938.6074                | 955.6339                | 576.3868             | 517.3133                  | 560.3686                             |
| 10                         | G    | 995.6288                | 1012.655                | 463.3027             |                           | 447.2846                             |
| 11                         | K    | 1123.724                | 1140.75                 | 406.2813             | 332.1969                  | 390.2631                             |
| 12                         | L    | 1236.808                | 1253.834                | 278.1863             | 219.1128                  | 262.1681                             |
| 13                         | F    | -                       | -                       | 165.1022             | 72.04439                  | 149.0841                             |
| sequence<br>:FLPLIAGLLGKLF |      |                         |                         |                      |                           |                                      |

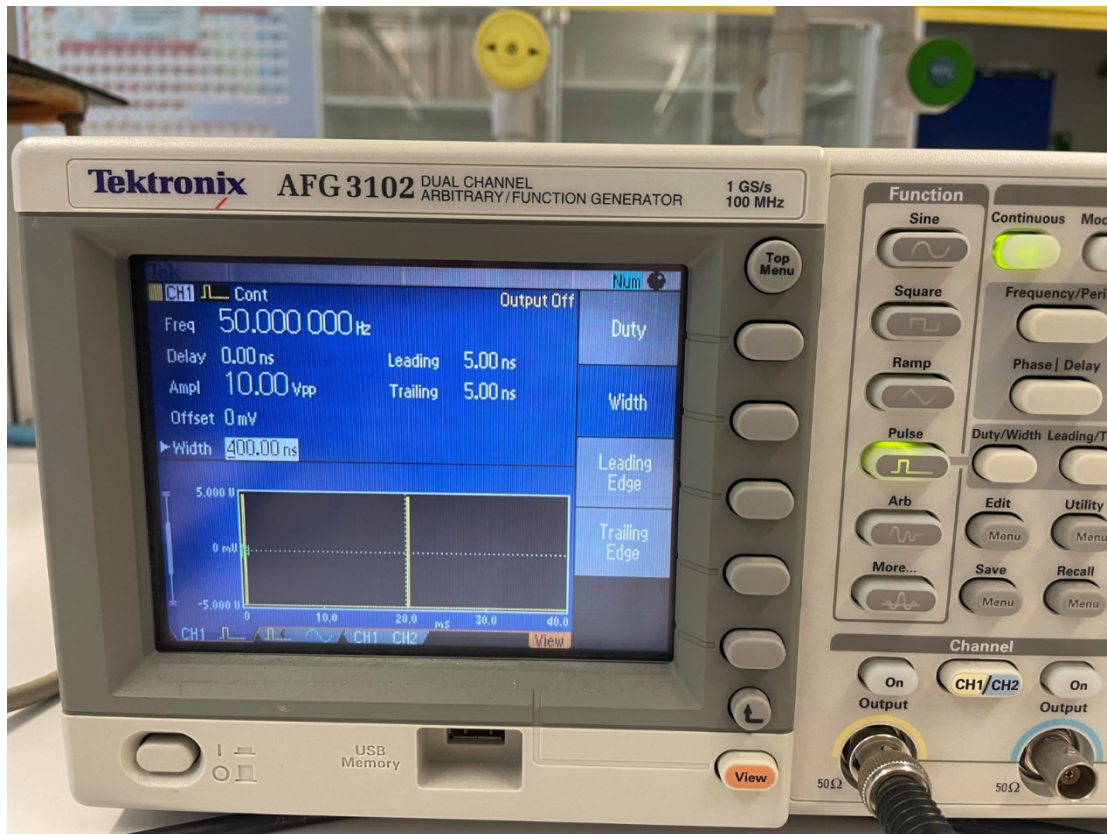

Figure S1. Electrostimulator for the “milking” procedure

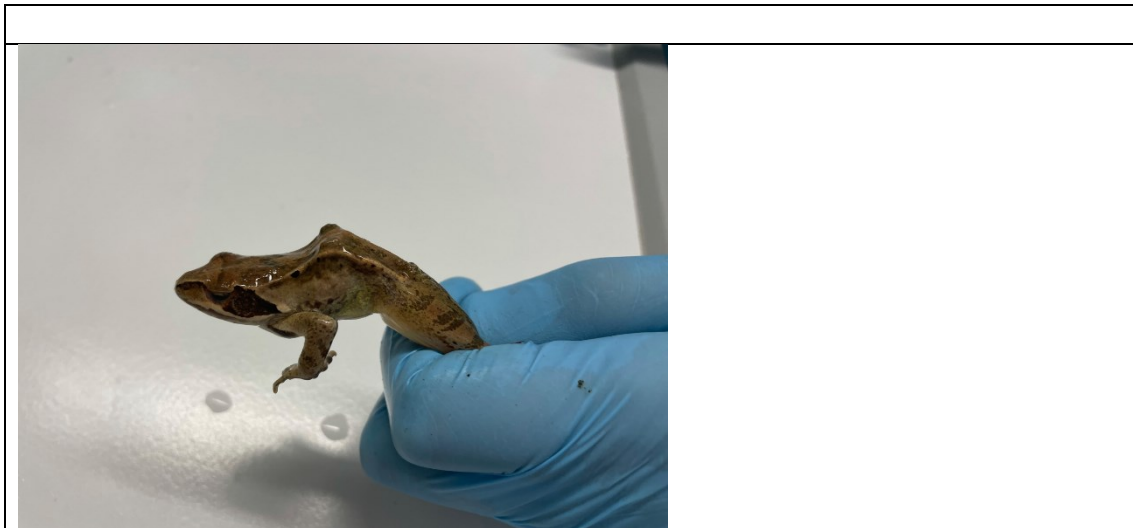

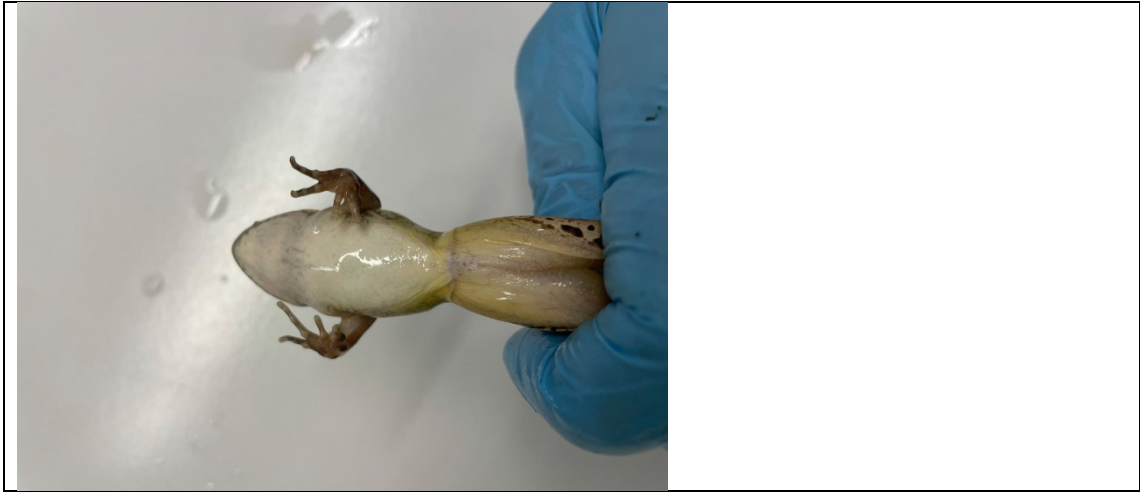

Figure S2. a,b. *Rana dalmatina* “milking” process

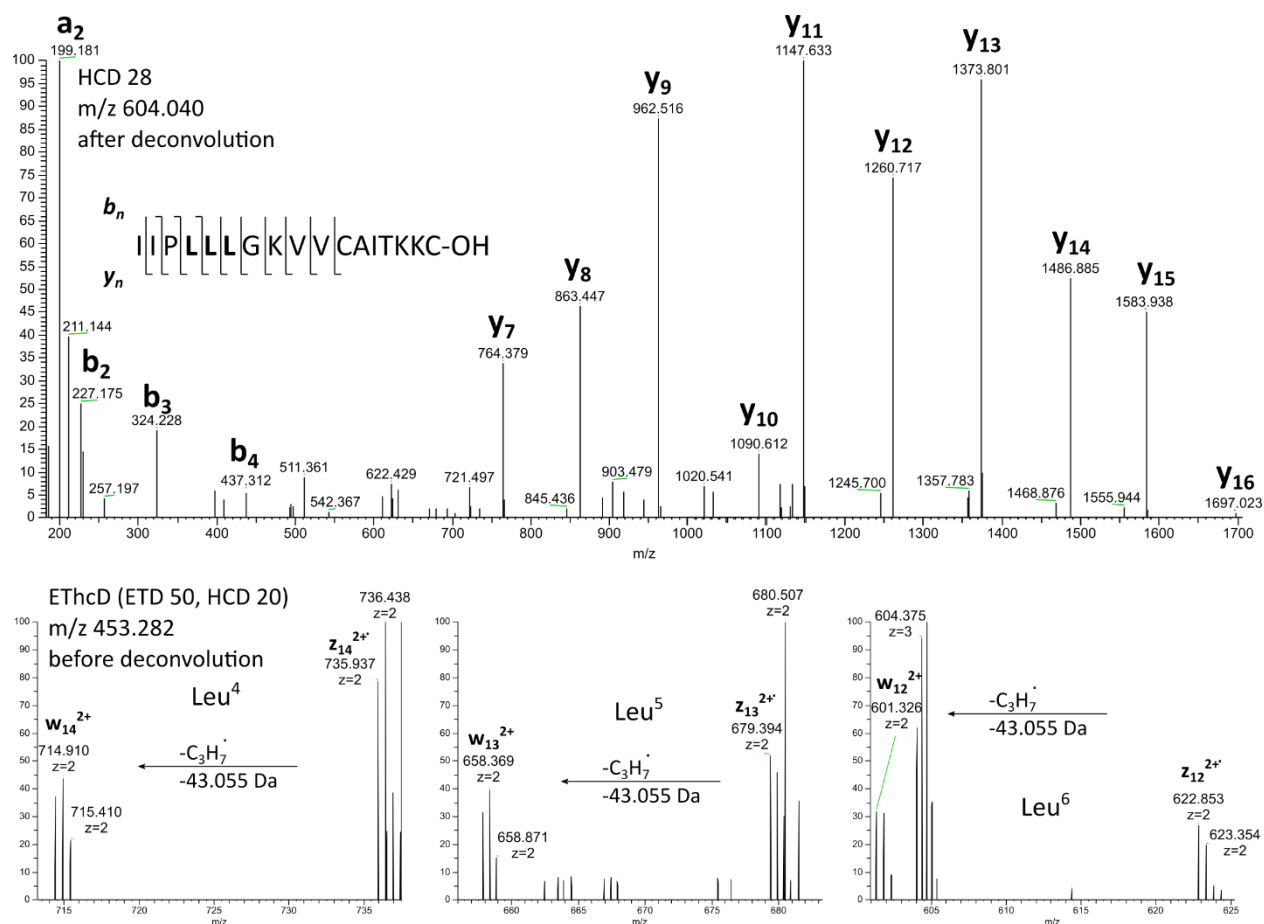

Figure S3. Brevinin 1Db mass spectra

## Orbitrap Fusion Method Summary

Creator: 8R74CY1\Orbitrap Fusion

Last Modified: 12/17/2021 12:32:19 by 8R74CY1\Orbitrap Fusion

### Global Settings

Use Ion Source Settings from Tune = False  
 Method Duration (min)= 90  
 Ion Source Type = NSI  
 Spray Voltage: Positive Ion (V) = 1900  
 Spray Voltage: Negative Ion (V) = 600  
 Infusion Mode (LC)= False  
 Sweep Gas (Arb) = 0  
 Ion Transfer Tube Temp (°C) = 300  
 APPI Lamp = Not in use  
 FAIMS Mode = Not Installed  
 Internal Mass Calibration= User Defined Lock Mass  
 Application Mode = Peptide  
 Pressure Mode = Standard  
 Default Charge State = 4  
 Advanced Peak Determination = True  
 Xcalibur AcquireX enabled for method modifications = False  
 Internal Cal Positive  
 m/z  
 445.12003

## Experiment 1

Experiment Name = Orbitrap CID-HCD-ETD

Start Time (min) = 0

End Time (min) = 90

### Scan MasterScan

Desired minimum points across the peak = 6

MSn Level = 1

Use Wide Quad Isolation = True

Detector Type = Orbitrap

Orbitrap Resolution = 240K

Mass Range = Normal

Scan Range (m/z) = 300-2000

Maximum Injection Time (ms) = 100

AGC Target = 400000

Normalized AGC Target = 100%

Microscans = 1

Maximum Injection Time Type = Custom

RF Lens (%) = 60

Use ETD Internal Calibration = False

DataType = Profile

Polarity = Positive

Source Fragmentation = False

Scan Description =

Enhanced Resolution Mode = Off

### Filter MIPS

Relax Restrictions when too few Precursors are Found = True

MIPS Mode = Peptide

### Filter ChargeState

Include charge state(s) = 2-20

Include undetermined charge states = True

### Filter DynamicExclusion

Exclude after n times = 1

Exclusion duration (s) = 5

Mass Tolerance = ppm

Mass tolerance low = 10

Mass tolerance high = 10

Use Common Settings = False

Exclude isotopes = True

Perform dependent scan on single charge state per precursor only = False

Exclude Within Cycle = False

### Filter IntensityThreshold

Maximum Intensity = 1E+20

Minimum Intensity = 100000

Relative Intensity Threshold = 0

Intensity Filter Type = IntensityThreshold

Data Dependent Properties

Data Dependent Mode= Number of Scans

Number of Dependent Scans= 5

Scan Event 1

Scan ddMSnScan

MSn Level = 2

Desired minimum points across the peak = 6

Isolation Mode = Quadrupole

Isolation Window = 1.6

Isolation Offset = Off

Enable Auto PTR Windows = False

Reported Mass = Original Mass

Multi-notch Isolation = False

Scan Range Mode = Auto

Scan Priority= 1

Collision Energy Mode = Fixed

ActivationType = CID

Collision Energy (%) = 35

Activation Time (ms) = 10

Activation Q = 0.25

Multistage Activation = False

Detector Type = Orbitrap

Orbitrap Resolution = 60K

Maximum Injection Time (ms) = 200

AGC Target = 50000

Normalized AGC Target = 100%

Inject ions for all available parallelizable time = False

Microscans = 1

Maximum Injection Time Type = Custom

Use ETD Internal Calibration = False

DataType = Profile

Polarity = Positive

Source Fragmentation = False

Scan Description =

Enhanced Resolution Mode = Off

Scan Event 2

Scan ddMSnScan

Desired minimum points across the peak = 9

MSn Level = 2

Isolation Mode = Quadrupole

Isolation Offset = Off

Isolation Window = 1.6

Enable Auto PTR Windows = False

Reported Mass = Original Mass

Multi-notch Isolation = False

Scan Range Mode = Auto

Scan Priority= 1

ActivationType = HCD  
Collision Energy Mode = Fixed  
Collision Energy (%) = 28  
Detector Type = Orbitrap  
Orbitrap Resolution = 60K  
Maximum Injection Time (ms) = 200  
AGC Target = 50000  
Inject ions for all available parallelizable time = False  
Normalized AGC Target = 100%  
Microscans = 1  
Maximum Injection Time Type = Custom  
Use ETD Internal Calibration = False  
DataType = Profile  
Polarity = Positive  
Source Fragmentation = False  
Scan Description =  
Enhanced Resolution Mode = Off

Scan Event 3

Scan ddMSnScan

Desired minimum points across the peak = 9  
MSn Level = 2  
Isolation Mode = Quadrupole  
Isolation Offset = Off  
Isolation Window = 1.6  
Enable Auto PTR Windows = False  
Reported Mass = Original Mass  
Multi-notch Isolation = False  
Scan Range Mode = Auto  
Scan Priority = 1  
ActivationType = ETD  
Use calibrated charge dependent ETD parameters = False  
ETD Reaction Time (ms) = 50  
ETD Reagent Target = 200000  
Max ETD Reagent Injection Time (ms) = 200  
ETD Supplemental Activation = False  
Detector Type = Orbitrap  
Orbitrap Resolution = 60K  
Maximum Injection Time (ms) = 200  
AGC Target = 50000  
Inject ions for all available parallelizable time = False  
Normalized AGC Target = 100%  
Microscans = 1  
Maximum Injection Time Type = Custom  
Use ETD Internal Calibration = False  
DataType = Profile  
Polarity = Positive  
Source Fragmentation = False  
Scan Description =  
Enhanced Resolution Mode = Off
